# Supplementary material for: STIM1 Is a Novel Component of ER-Chlamydia trachomatis Inclusion Membrane Contact Sites
Source: PubMed Central journal article supplement (PMC4411163; doi:10.1371/journal.pone.0125671), 2015-04-27
Supplement: pone.0125671.s006.pdf [file pone.0125671.s006.pdf]

S1 Table: Primers used in this study.

| <b>PRIMER NAME</b>    | <b>PRIMER SEQUENCE</b>                          |
|-----------------------|-------------------------------------------------|
| STIM1 5Eco            | GAAGAATTCatggatgatgcgtccgtcttgccc               |
| STIM1 685 3Xho        | CTCCTCGAGGctacttcttaagaggcttcttaaag             |
| STIM1 672 3Xho        | CTCCTCGAGCTAccggcctgggctggagtctg                |
| STIM1 535 3Xho        | CTCCTCGAGCTAggggggccacacgctggcgggtcac           |
| STIM1 389 3Xho        | CTCCTCGAGCTAtgtgtttctctctttttatcttc             |
| STIM1 340 3Xho        | CTCCTCGAGCTAtgagctgtgagattctagctcc              |
| STIM1 Delta 253-535 5 | gaaggacttgagggggttacacaaacctcctcagatgagccgtgc   |
| STIM1 Delta 253-535 3 | gcacggctcatctgaggaggtttgtgtaacctccaagtcttc      |
| STIM1 Delta 342-448 5 | agctagaatctcacagctcatggctactggtggctgcctcaacatag |
| STIM1 Delta 342-448 3 | ctatgttgagggcagccaccagtgacatgagctgtgagattctagc  |
| STIM1 Delta 449-535 5 | gtcaacaacctggcatccacaaacctcctcagatgagccgtgc     |
| STIM1 Delta 449-535 3 | gcacggctcatctgaggaggtttgtggatgccagggtgttgac     |
